# Supplementary material
Source: Springer Nature journal article supplement (https://www.springermedizin.de/resource/supplementary/40169_2013_42_MOESM3_ESM.pdf/9675440)

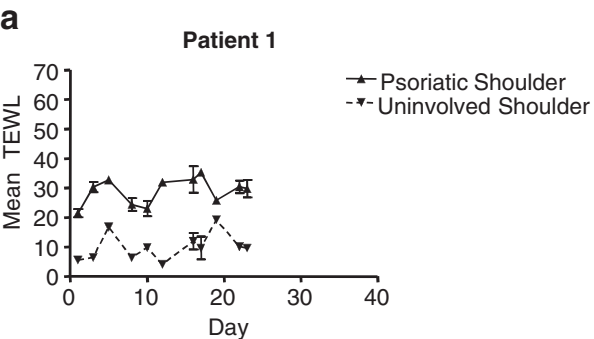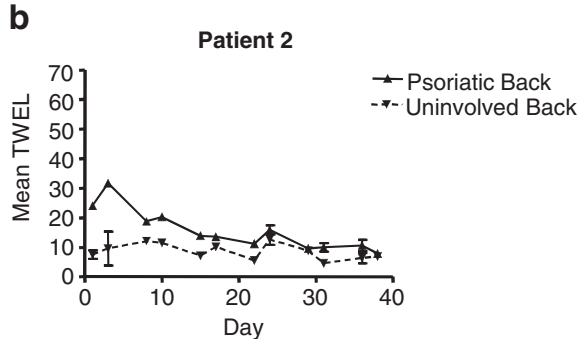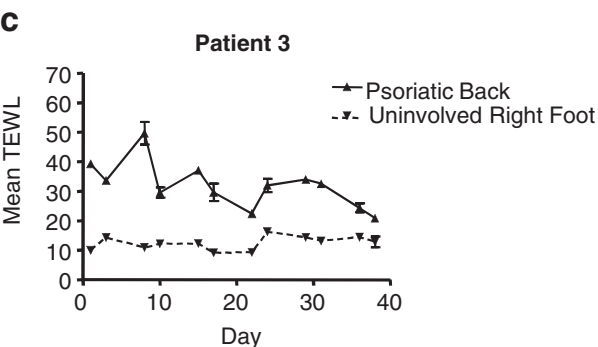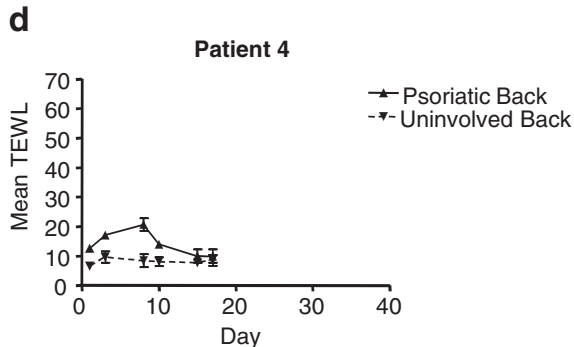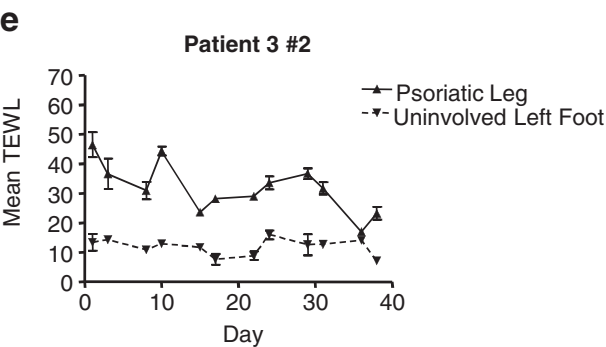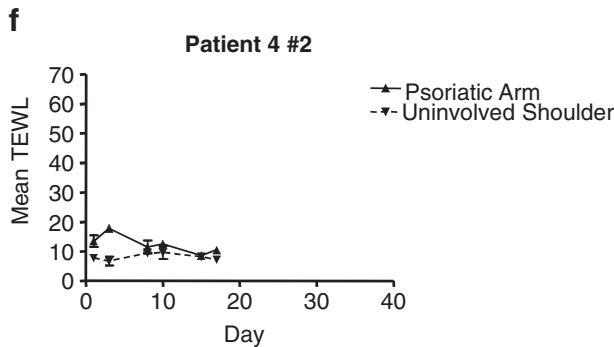

Supplement: MOESM3 [file 9675440]
